# Supplementary material for: The Organization of Pericentromeric Heterochromatin in Polytene Chromosome 3 of the Drosophila melanogaster Line with the Rif11; SuURES Su(var)3-906 Mutations Suppressing Underreplication
Source: MDPI journal article supplement (doi:10.3390/cells10112809), 2021-10-20
Supplement: s1 [file s1]

**Table S1.** Coordinates of DNA probes for the pericentromeric heterochromatin of 3<sup>rd</sup> chromosome

| Nº | Genes                  | Probes     | FlyBase R.5 |          | FlyBase R.6 |          |
|----|------------------------|------------|-------------|----------|-------------|----------|
| 1  | <i>laza</i>            | laza       | 22453414    | 22453983 | 22460314    | 22460883 |
| 2  | <i>l(3)04053</i>       | 4053       | 22734398    | 22735055 | 22741298    | 22741955 |
| 3  | <i>CklIalpha</i>       | CkII       | 23088583    | 23089008 | 23095483    | 23095908 |
| 4  | <i>Vps11</i>           | Vps        | 23144198    | 23144944 | 23151098    | 23151844 |
| 5  | <i>CG17454</i>         | CG17514    | 23706808    | 23707423 | 23713708    | 23714323 |
| 6  | <i>mRps5</i>           | mRps5      | 24534807    | 24535539 | 24542069    | 24542439 |
| 7  | <i>Set1</i>            | Set1       | 595557      | 596293   | 25110101    | 25110837 |
| 8  | <i>CG40178</i>         | CG40178_5' | 1403946     | 1406689  | 25796760    | 25797528 |
| 9  | <i>CG40228</i>         | CG40228    | 2189654     | 2190386  | 27082829    | 27083561 |
| 10 | <i>RpL15</i>           | RpL15      | 2397821     | 2398985  | 27267285    | 27268449 |
| 11 | <i>CG17514</i>         | CG17514    | 2776414     | 2777105  | 28011347    | 28012038 |
| 12 | <i>Pzl</i>             | Pzl_9-10   | 2232516     | 2232917  | 3061656     | 3062057  |
| 13 | <i>Pzl</i>             | Pzl_5'     | 2204925     | 2205427  | 3262820     | 3263322  |
| 14 | <i>Tim17b</i>          | Tim17b     | 1817844     | 1818536  | 3740345     | 3741037  |
| 15 | <i>Gfat1</i>           | Gfat1      | 2480192     | 2481594  | 4136426     | 4137828  |
| 16 | <i>CG12581</i>         | CG12581    | 444         | 1153     | 4174722     | 4175431  |
| Nº | Satellites             | Probes     | FlyBase R.5 |          | FlyBase R.6 |          |
| 17 | Prodsat                | Prodsat    | -           | -        | -           | -        |
| 18 | Dodeca                 | Dodeca     | -           | -        | -           | -        |
| 19 | AAGAG                  | AAGAG      | -           | -        | -           | -        |
| 20 | (AACATAT) <sub>n</sub> | AACATAT    | -           | -        | -           | -        |
