# Supplementary material for: The Organization of Pericentromeric Heterochromatin in Polytene Chromosome 3 of the Drosophila melanogaster Line with the Rif11; SuURES Su(var)3-906 Mutations Suppressing Underreplication
Source: MDPI journal article supplement (doi:10.3390/cells10112809), 2021-10-20
Supplement: s1 [file s1]

**Table S3.** Density of genes in the regions of euchromatin and pericentromeric heterochromatin of 3<sup>rd</sup> chromosome

| <b>Regions of Physical Map (FlyBase Release 5)</b> | <b>Number of Genes</b> | <b>DNA Length, Mb</b> | <b>Density (Number of Genes per 1Mb of DNA)</b> |
|----------------------------------------------------|------------------------|-----------------------|-------------------------------------------------|
| distal to pICon(79D)                               | 234                    | 1,8                   | 130                                             |
| between pICon(79D) and CkII/Vps                    | 91                     | 0,8                   | 114                                             |
| between CkII/Vps and mRps5                         | 31                     | 1,4                   | 22,1                                            |
| 3Lhet                                              | 26                     | 2,6                   | 10                                              |
| 3Rhet                                              | 21                     | 2,5                   | 8,4                                             |
| distal to CG12581                                  | 360                    | 2,5                   | 144                                             |

  

| <b>Regions of Physical Map (FlyBase Release 6)</b> | <b>Number of Genes</b> | <b>DNA Length, Mb</b> | <b>Density (Number of Genes per 1Mb of DNA)</b> |
|----------------------------------------------------|------------------------|-----------------------|-------------------------------------------------|
| distal to pICon(79D)                               | 441                    | 2,7                   | 163,3                                           |
| between pICon(79D) and CkII/Vps                    | 109                    | 0,9                   | 121,1                                           |
| between CkII/Vps and mRps5                         | 25                     | 1,4                   | 17,9                                            |
| between mRps5 and CG17514                          | 35                     | 3,6                   | 9,7                                             |
| between Myo81F and Gfat1                           | 17                     | 4,1                   | 4,1                                             |
| between Gfat1 and CG12581                          | 2                      | 0,04                  | 50                                              |
| distal to CG12581                                  | 634                    | 4,1                   | 154,6                                           |
