# Supplementary material for: The Organization of Pericentromeric Heterochromatin in Polytene Chromosome 3 of the Drosophila melanogaster Line with the Rif11; SuURES Su(var)3-906 Mutations Suppressing Underreplication
Source: MDPI journal article supplement (doi:10.3390/cells10112809), 2021-10-20
Supplement: s1 [file s1]

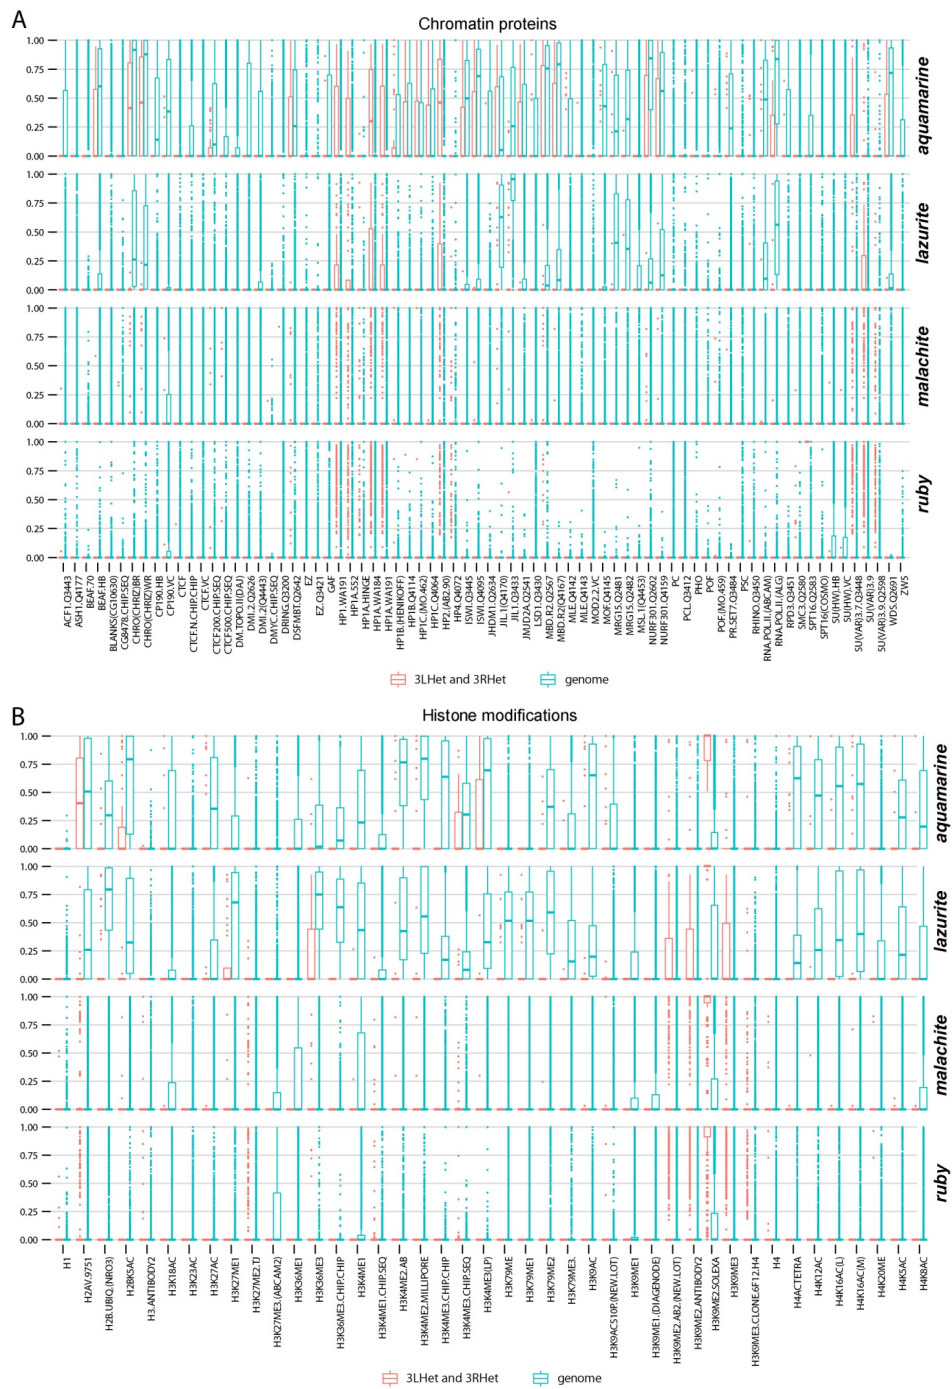

**Figure S1.** Comparison of the enrichment of four types of chromatin in heterochromatic regions of 3<sup>rd</sup> chromosome (3LHet and 3RHet) and the euchromatin part of the *Drosophila* genome [6] with proteins and histone modifications (modENCODE data, cell line S2).
