# Supplementary material for: The Organization of Pericentromeric Heterochromatin in Polytene Chromosome 3 of the Drosophila melanogaster Line with the Rif11; SuURES Su(var)3-906 Mutations Suppressing Underreplication
Source: MDPI journal article supplement (doi:10.3390/cells10112809), 2021-10-20
Supplement: s1 [file s1]

**Table S4.** Density\* of ORCs\*\* in the regions of euchromatin and pericentomeric heterochromatin of 3<sup>rd</sup> chromosome

| Region of Physical Map<br>(FlyBase R.5) | DNA Length, Mb | Density (number) of<br>ORCs.S2*** | Density (number) of<br>ORCs.Kc*** | Density (number)<br>of ORCs.BG3*** | Density (number)<br>of ORCs.SG*** |
|-----------------------------------------|----------------|-----------------------------------|-----------------------------------|------------------------------------|-----------------------------------|
| distal to pICon(79D)                    | 1,8            | 24 (44)                           | 41 (73)                           | 34 (62)                            | 54 (97)                           |
| between pICon(79D) and<br>CkII/Vps      | 0,8            | 26 (21)                           | 34 (27)                           | 36 (29)                            | 35 (28)                           |
| between CkII/Vps and mRps5              | 1,4            | 2 (3)                             | 7 (10)                            | 5 (7)                              | 4 (5)                             |
| between mRps5 and CG17514               | 3,6            | 2 (7)                             | 4 (14)                            | 3 (12)                             | 4 (14)                            |
| between Myo81F and Gfat1                | 4,1            | 2 (7)                             | 3 (13)                            | 1 (6)                              | 2 (9)                             |
| distal to CG12581                       | 4,1            | 23 (95)                           | 28 (115)                          | 23 (94)                            | 42 (173)                          |

\*Density=Number of ORCs per Mb of DNA

\*\*According to [74,75]

\*\*\*S2, Kc and BG3 – cell cultures, SG – salivary glands
