# Supplementary material for: The Organization of Pericentromeric Heterochromatin in Polytene Chromosome 3 of the Drosophila melanogaster Line with the Rif11; SuURES Su(var)3-906 Mutations Suppressing Underreplication
Source: MDPI journal article supplement (doi:10.3390/cells10112809), 2021-10-20
Supplement: s1 [file s1]

**Table S2.** Primers for the probes used

| №  | Genes                  | Probes     | Primers       | Sequence, 5'-3'                    | T Annealing, °C |
|----|------------------------|------------|---------------|------------------------------------|-----------------|
| 1  | <i>laza</i>            | laza       | laza_L        | 5'-AGCTCGGTGGTGAGATAGGT-3'         | 57              |
|    |                        |            | laza_R        | 5'-CTGACTGACTGACGGCTGTT-3'         | 57              |
| 2  | <i>l(3)04053</i>       | 4053       | 4053_L        | 5'-TCTTGTGGTCGCGTTCTCTC-3'         | 57              |
|    |                        |            | 4053_R        | 5'-TGGAGCCTGACCTCGTTAGA-3'         | 58              |
| 3  | <i>CkIIalpha</i>       | CkII       | CkII_L        | 5'-GCACAAAAGGTTTCGTGCGA-3'         | 57              |
|    |                        |            | CkII_R        | 5'-AACTCTTAGCGGTCCGTTTCG-3'        | 57              |
| 4  | <i>Vps11</i>           | Vps        | Vps_L         | 5'-AGAGCAATAGCTTTCCGCGT-3'         | 57              |
|    |                        |            | Vps_R         | 5'-CCAACCCGTAACGTCACACA-3'         | 58              |
| 5  | CG17454                | CG17514    | CG17514_L     | 5'-TGTACGTCAACCAGAACGGG-3'         | 57              |
|    |                        |            | CG17514_R     | 5'-GGCAAAGTTCGGTTGCCAAT-3'         | 57              |
| 6  | <i>mRps5</i>           | mRps5      | mRps5_L       | 5'-ACGTCCTCTCCCCACATTA-3'          | 58              |
|    |                        |            | mRps5_R       | 5'-TTACTCCGCGCCAAATGTCT-3'         | 57              |
| 7  | <i>Set1</i>            | Set1       | Set1_L        | 5'-GGACACCGAATTCATCCACG-3'         | 56              |
|    |                        |            | Set1_R        | 5'-GGGGTGGTTGTACTGGATGA-3'         | 57              |
| 8  | CG40178                | CG40178 5' | CG40178 5' _L | 5'-TCGTTTTACCGCTGCGTATG-3'         | 56              |
|    |                        |            | CG40178 5' _R | 5'-AGGCGGAACTGGAATGAAGA-3'         | 56              |
| 9  | CG40228                | CG40228    | CG40228_L     | 5'-GTAGGGTGTGCTTGGAGGAT-3'         | 57              |
|    |                        |            | CG40228_R     | 5'-GCAAATGGGCAAACGATTCC-3'         | 55              |
| 10 | <i>RpL15</i>           | RpL15      | RpL15-1       | 5'-TAAGTTGGTTGTGCATTCCG-3'         | *               |
|    |                        |            | RpL15-2       | 5'-CTTTGCGTGCACGAAGTG-3'           | *               |
| 11 | CG17514                | CG17514    | CG17514_L     | 5'-GACATGCTTGGCCCGTAG-3'           | 56              |
|    |                        |            | CG17514_R     | 5'-GCCCAAACATTCCCTTCTT-3'          | 54              |
| 12 | <i>Pzl</i>             | Pzl_9-10   | Pzl 9-10_L    | 5'-ACCGAACACCGTTCAGTTT-3'          | 58              |
|    |                        |            | Pzl 9-10_R    | 5'-GCAAAGGGACGCCAATTGTT-3'         | 58              |
| 13 | <i>Pzl</i>             | Pzl_5'     | Pzl 5-2_L     | 5'-AAGGTCTCAAAGTCGACGCA-3'         | 58              |
|    |                        |            | Pzl 5-2_R     | 5'-AGTACTTTCGGCATCGTCGG-3'         | 58              |
| 14 | <i>Tim17b</i>          | Tim17b     | Tim17b_L      | 5'-TTTGGATCAAGCCATCAACA-3'         | 52              |
|    |                        |            | Tim17b_R      | 5'-ACTATTTTGTGGCCGAAACG-3'         | 54              |
| 15 | <i>Gfat1</i>           | Gfat1      | gfat1-1       | 5'-CGATGTTGCTGCTGTTTCG-3'          | *               |
|    |                        |            | gfat1-2       | 5'-CGGTTTATCCGAAAATATGGA-3'        | *               |
| 16 | CG12581                | CG12581    | CG12581_L     | 5'-GAACCAGGGGAAACGTAGCA-3'         | 57              |
|    |                        |            | CG12581_R     | 5'-AAGTACTCGGCATCGGCAAA-3'         | 57              |
| №  | Satellites             | Probes     | Primers       | Sequence, 5'-3'                    | T annealing, °C |
| 17 | Prodsat                | Prodsat    | AATAACATAG_L  | 5'-AATAACATAG) <sub>3</sub> -3'    | **              |
|    |                        |            | AATAACATAG_R  | 5'-(CTATGTTATT) <sub>3</sub> -3'   | **              |
| 18 | Dodeca                 | Dodeca     | DODECA_L      | 5'-(ACCGAGTACGGG) <sub>3</sub> -3' | **              |
|    |                        |            | DODECA_R      | 5'-(CCCGTACACGGT) <sub>3</sub> -3' | **              |
| 19 | AAGAG                  | AAGAG      | AAGAG_L       | 5'-(AAGAG) <sub>4</sub> -3'        | **              |
|    |                        |            | CTCTT_R       | 5'-(CTCTT) <sub>4</sub> -3'        | **              |
| 20 | (AACATAT) <sub>n</sub> | AACATAT    | AACATAT_L     | L: 5'-( AACATAT) <sub>4</sub> -3'  | **              |
|    |                        |            | AACATAT_R     | R: 5'-(ATATGTT) <sub>4</sub> -3'   | **              |

\*[53]

\*\*[64]
